# Supplementary material for: Effects of Occupational and Leisure-Time Physical Activities on Insomnia in Korean Firefighters
Source: MDPI journal article supplement (doi:10.3390/ijerph17155397), 2020-07-27
Supplement: s1 [file s1]

## Supplementary Materials

**Table S1.** Association between leisure time physical activity (LTPA) and insomnia according to subjective occupational physical activity (subjective OPA) in the group without psychological symptoms (n= 8,578). [aOR = adjusted odds ratio; CI = confidence interval].

| Variables                 | n    | Low Subjective OPA |                  |             | n    | High Subjective OPA |                  |             |
|---------------------------|------|--------------------|------------------|-------------|------|---------------------|------------------|-------------|
|                           |      | Cases              | aOR <sup>a</sup> | 95% CI      |      | Cases               | aOR <sup>a</sup> | 95% CI      |
| Do LTPA                   |      |                    |                  |             |      |                     |                  |             |
| No                        | 553  | 22 (4.0%)          | 1.00             | Ref         | 1214 | 94 (7.7%)           | 1.00             | Ref         |
| Yes                       | 2221 | 64 (2.9%)          | 0.617            | 0.376–1.045 | 4590 | 281 (6.1%)          | 0.720            | 0.560–0.925 |
| Kind of LTPA              |      |                    |                  |             |      |                     |                  |             |
| Do not perform aerobic PA | 217  | 7 (3.2%)           | 1.00             | Ref         | 475  | 34 (7.2%)           | 1.00             | Ref         |
| Perform aerobic PA        | 2004 | 57 (2.8%)          | 0.748            | 0.332–1.687 | 4115 | 247 (6.0%)          | 0.804            | 0.552–1.170 |
| Intensity of LTPA         |      |                    |                  |             |      |                     |                  |             |
| Low                       | 1604 | 50 (3.1%)          | 1.00             | Ref         | 3511 | 198 (5.6%)          | 1.00             | Ref         |
| High                      | 617  | 14 (2.3%)          | 0.732            | 0.396–1.353 | 1079 | 83 (7.7%)           | 1.388            | 1.059–1.819 |
| Enough rest after LTPA    |      |                    |                  |             |      |                     |                  |             |
| No                        | 201  | 16 (8.0%)          | 1.00             | Ref         | 577  | 66 (11.4%)          | 1.00             | Ref         |
| Yes                       | 2020 | 48 (2.4%)          | 0.287            | 0.158–0.522 | 4013 | 215 (5.4%)          | 0.440            | 0.327–0.592 |

<sup>a</sup> adjusted for sex, age, education, marital status, monthly income, smoking status, alcohol consumption, caffeine intake, type of job (office work vs. others), work schedule flexibility, adequacy of notice time; OR = odds ratio; CI = confidence interval; PA = physical activity; OPA = occupational physical activity; LTPA = leisure time physical activity.

**Table S2.** Association between leisure time physical activity (LTPA) and insomnia according to objective occupational physical activity (objective OPA) in the group without psychological symptoms (n = 8,578). [aOR = adjusted odds ratio; CI = confidence interval].

| Variables                 | Low Objective OPA |            |                  |             | High Objective OPA |            |                  |             |
|---------------------------|-------------------|------------|------------------|-------------|--------------------|------------|------------------|-------------|
|                           | n                 | Cases      | aOR <sup>a</sup> | 95% CI      | n                  | Cases      | aOR <sup>a</sup> | 95% CI      |
| Do LTPA                   |                   |            |                  |             |                    |            |                  |             |
| No                        | 693               | 33 (4.8%)  | 1.00             | Ref         | 1074               | 83 (7.7%)  | 1.00             | Ref         |
| Yes                       | 2138              | 97 (4.5%)  | 0.751            | 0.490–1.152 | 4673               | 248 (5.3%) | 0.667            | 0.512–0.869 |
| Kind of LTPA              |                   |            |                  |             |                    |            |                  |             |
| Do not perform aerobic PA | 199               | 12 (6.0%)  | 1.00             | Ref         | 493                | 29 (5.9%)  | 1.00             | Ref         |
| Perform aerobic PA        | 1939              | 85 (4.4%)  | 0.661            | 0.350–1.248 | 4180               | 219 (5.2%) | 0.855            | 0.571–1.280 |
| Intensity of LTPA         |                   |            |                  |             |                    |            |                  |             |
| Low                       | 1687              | 77 (4.6%)  | 1.00             | Ref         | 3428               | 171 (5.0%) | 1.00             | Ref         |
| High                      | 451               | 20 (4.4%)  | 1.034            | 0.620–1.727 | 1245               | 77 (6.2%)  | 1.267            | 0.955–1.680 |
| Enough rest after LTPA    |                   |            |                  |             |                    |            |                  |             |
| No                        | 204               | 22 (10.8%) | 1.00             | Ref         | 574                | 60 (10.5%) | 1.00             | Ref         |
| Yes                       | 1934              | 75 (3.9%)  | 0.320            | 0.191–0.536 | 4099               | 188 (4.6%) | 0.420            | 0.308–0.573 |

<sup>a</sup> adjusted for sex, age, education, marital status, monthly income, smoking status, alcohol consumption, caffeine intake, type of job (office work vs. others), work schedule flexibility, adequacy of notice time; OR = odds ratio; CI = confidence interval; PA = physical activity; OPA = occupational physical activity; LTPA = leisure time physical activity.
